# Supplementary material
Source: publisher figshare collection journal article supplement (https://springernature.figshare.com/ndownloader/files/35041814)
Supplement: Supplementary file [file 35041814]

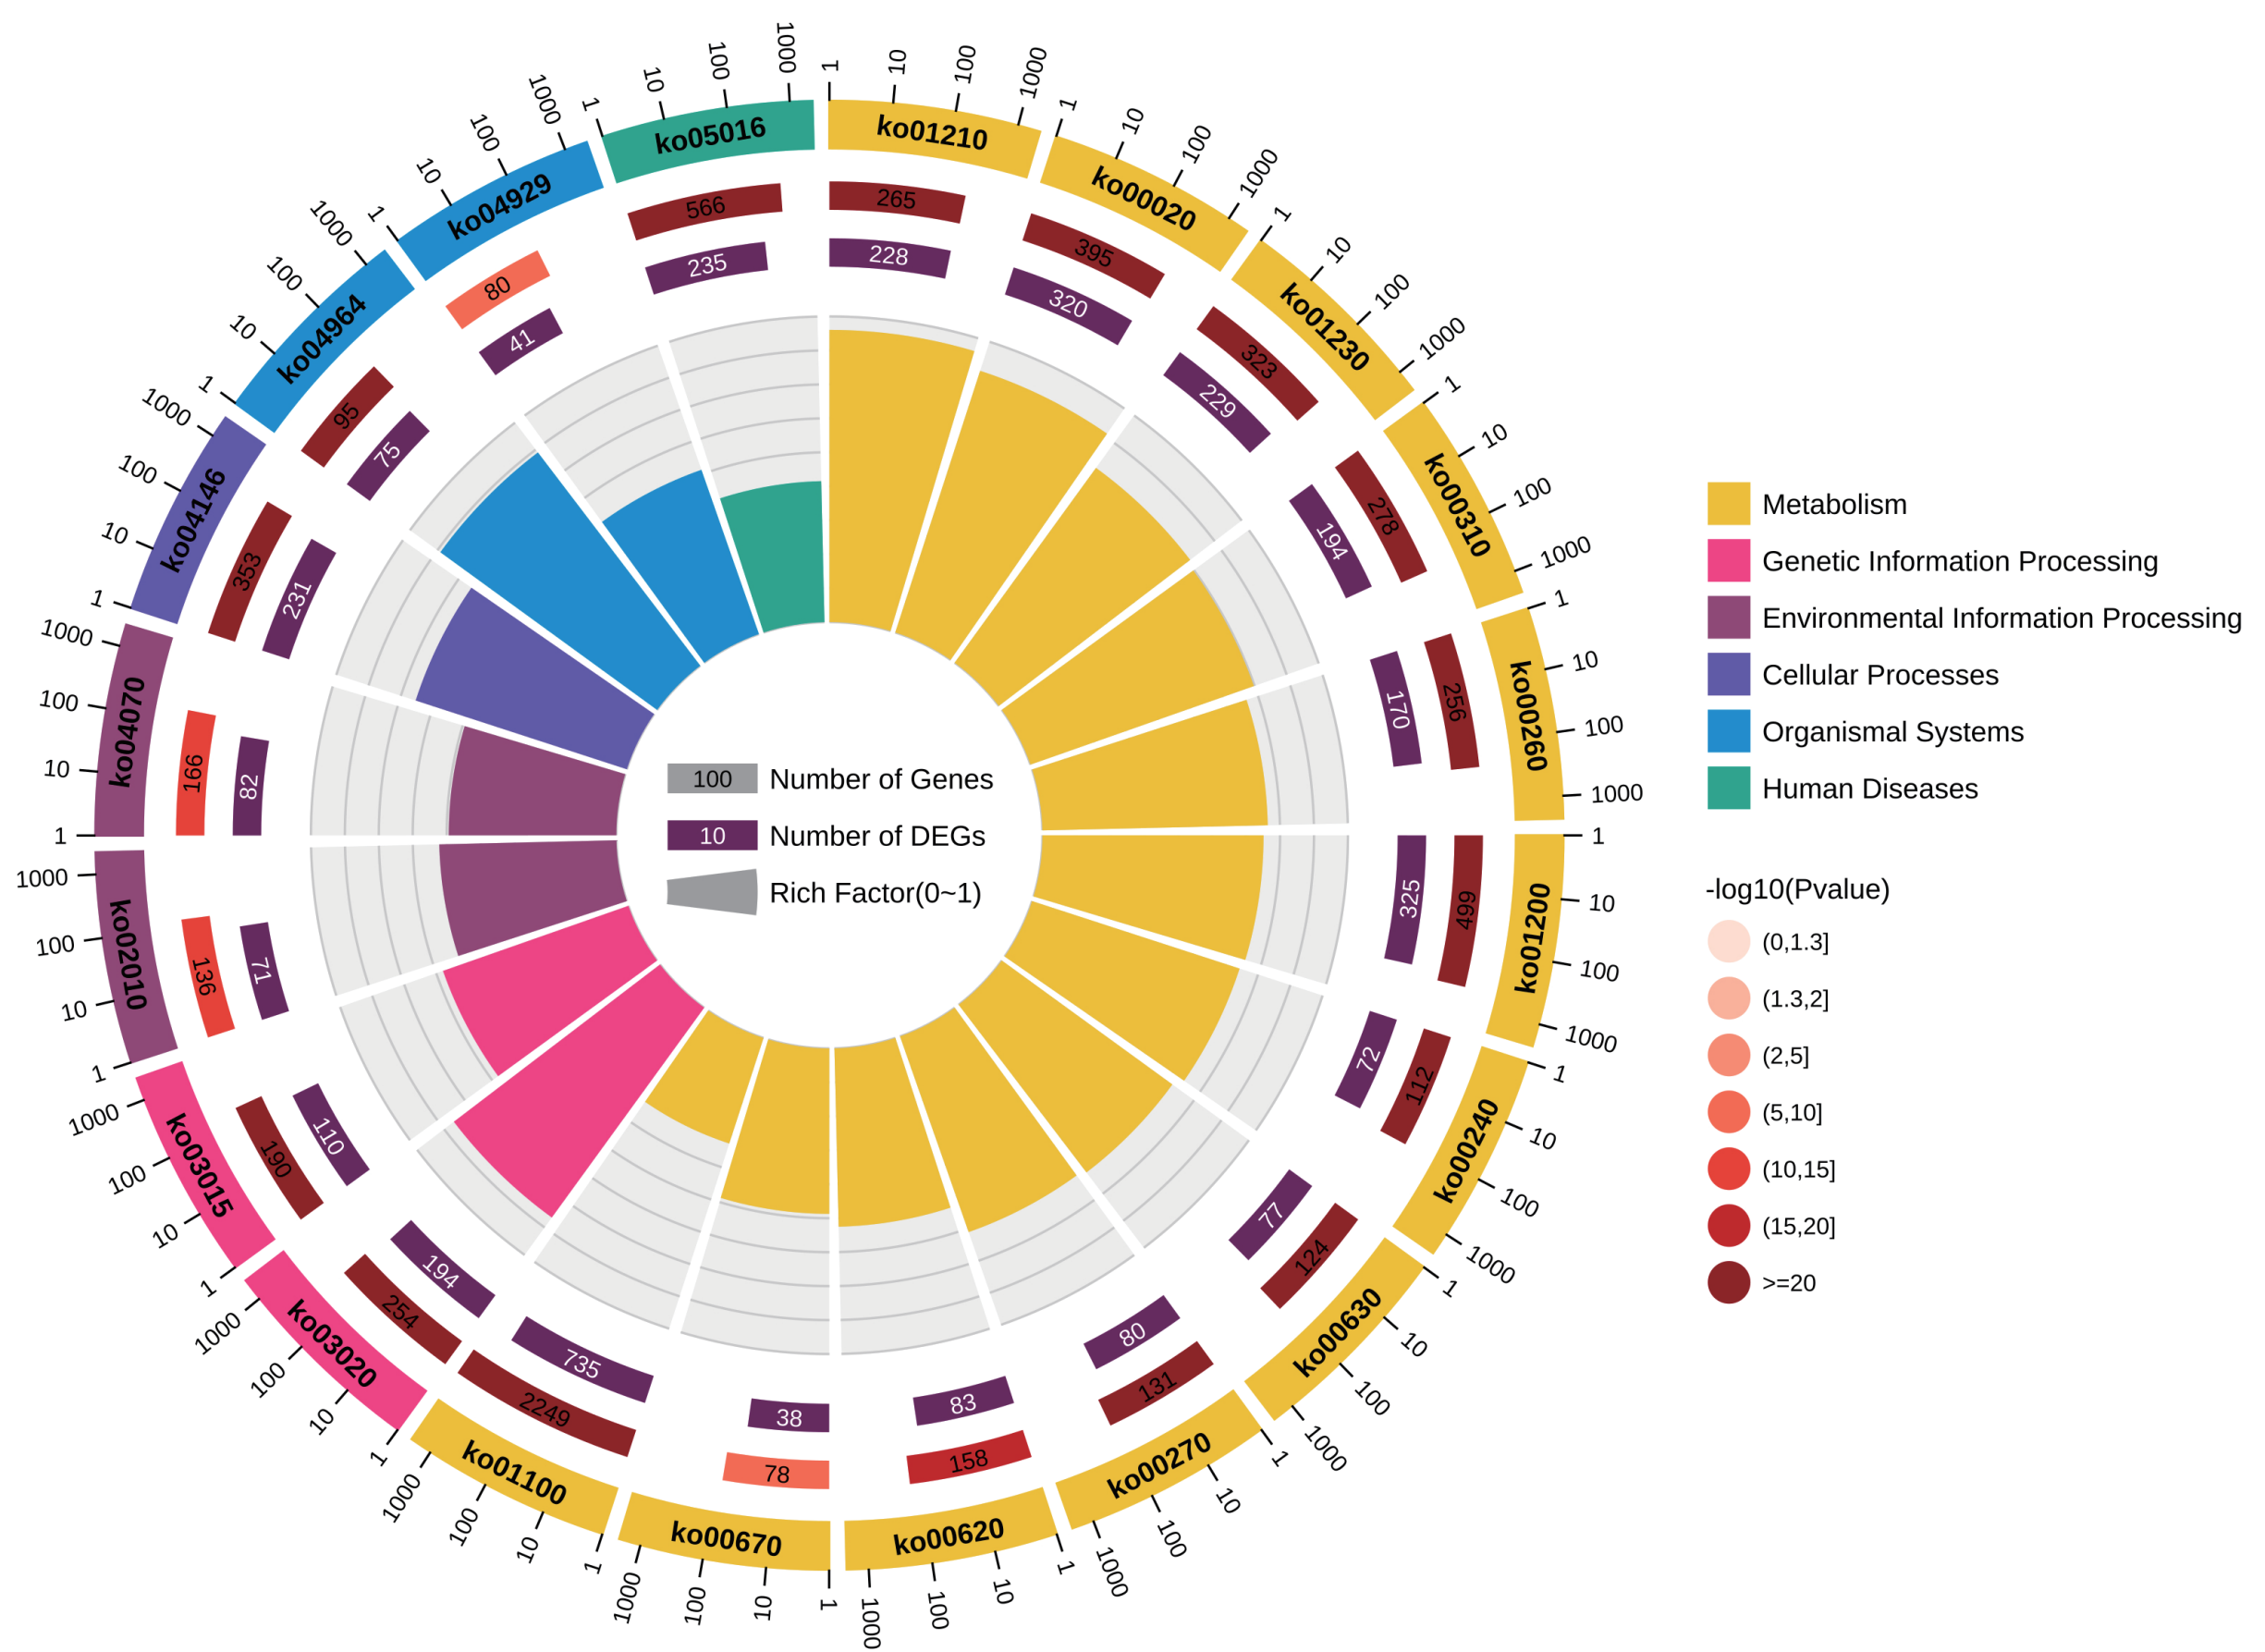

**Additional file 10: Fig. S3.** Kegg enrichment pathways of rapidly expanded gene families in *S. littoralis*
